# Supplementary material for: Improvement of Heat Resistance of Fluorosilicone Rubber Employing Vinyl-Functionalized POSS as a Chemical Crosslinking Agent
Source: MDPI journal article supplement (doi:10.3390/polym15051300), 2023-03-04
Supplement: s1 [file s1]

## Supporting Information

# Improvement of heat resistance of fluorosilicone rubber employing vinyl-functionalized POSS as a chemical crosslinking agent

Jae Il So, Chung Soo Lee, Byeong Seok Kim, Hyeon Woo Jeong, Jin Sung Seo, Sung-Hyeon Baeck, Sang Eun Shim\*, and Yingjie Qian\*

**Table S1** Functional groups and viscosity data of the F-silicone and F-crosslinker.

| Raw material  | Structure                                                                           | Functional group ratio<br>(mol %) |              |              |              | Viscosity<br>(cP) |
|---------------|-------------------------------------------------------------------------------------|-----------------------------------|--------------|--------------|--------------|-------------------|
|               |                                                                                     | DM-<br>block                      | MF-<br>block | MV-<br>block | MH-<br>block |                   |
| F-silicone    | 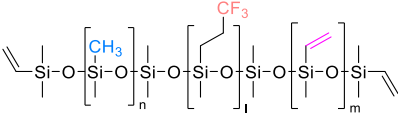 | 55.64                             | 43.11        | 1.25         |              | 12200             |
| F-crosslinker |  | 54.94                             | 34.09        |              | 10.97        | 970               |

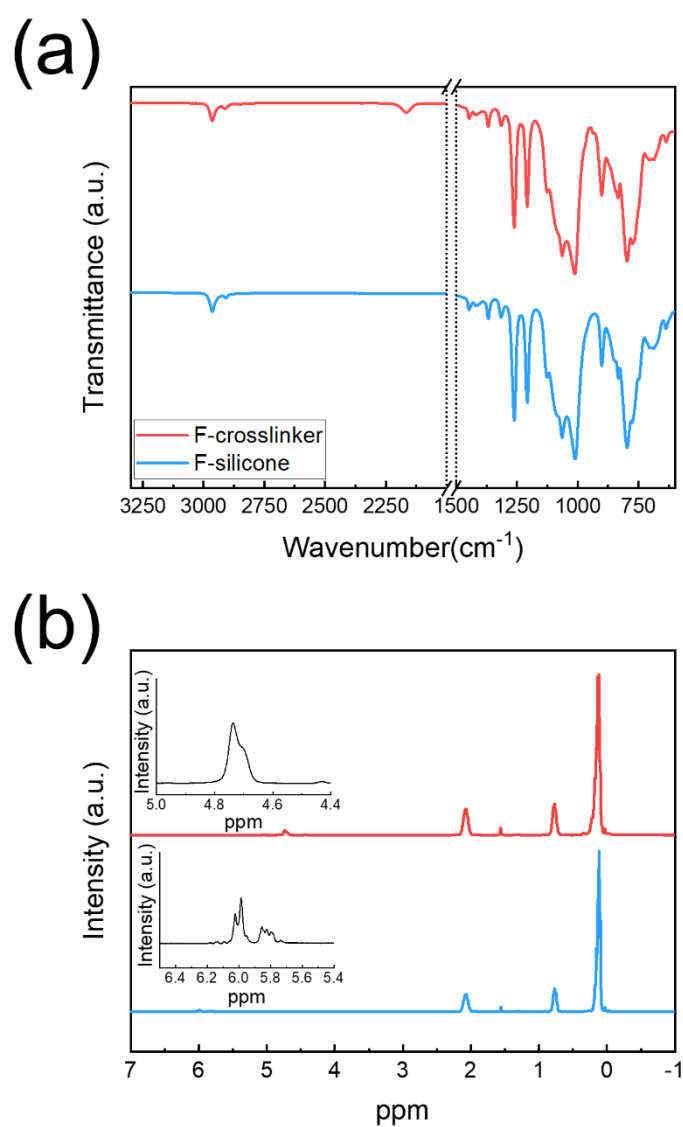

**Figure S1.** (a) FT-IR spectra of the F-silicone and F-crosslinker and (b)  $^1\text{H}$ -NMR spectra of the F-silicone and F-crosslinker.

**Table S2.** Formulation of the synthesized POSS-Vs.

| <b>Material</b> | <b>VTMS<br/>[molar ratio]</b> | <b>MTMS<br/>[molar ratio]</b> | <b>5 M HCl<br/>solution<br/>[molar ratio]</b> | <b>Theoretical<br/>vinyl content<br/>[mol%]</b> |
|-----------------|-------------------------------|-------------------------------|-----------------------------------------------|-------------------------------------------------|
| POSS-V0         | 0                             | 1                             | 6                                             | 0                                               |
| POSS-V4         | 0.5                           | 0.5                           | 27                                            | 50                                              |
| POSS-V6         | 0.75                          | 0.25                          | 27                                            | 75                                              |
| POSS-V8         | 1                             | 0                             | 27                                            | 100                                             |

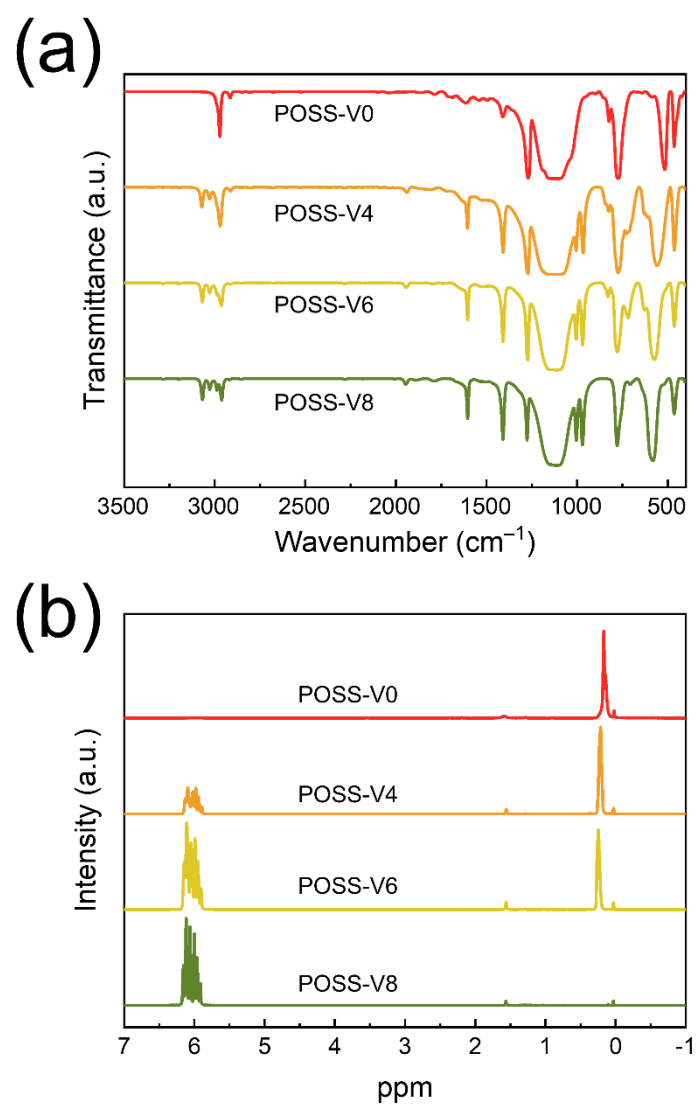

**Figure S2.** (a) FT-IR spectra of the synthesized POSS-Vs and (b)  $^1\text{H}$ -NMR spectra of the synthesized POSS-Vs.

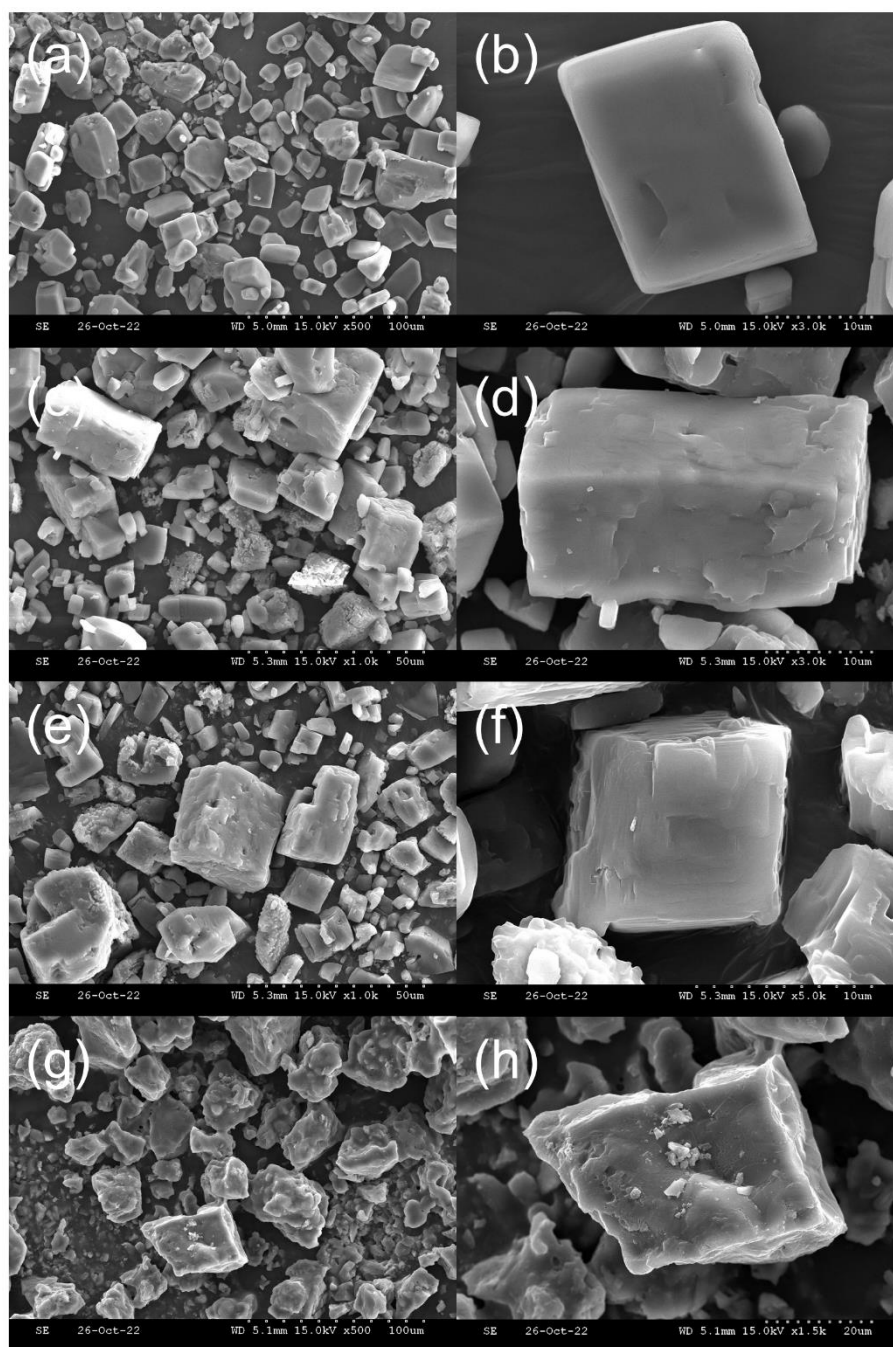

**Figure S3.** SEM microphotographs of the POSS-Vs: (a), (b) POSS-V8; (c), (d) POSS-V6; (e), (f) POSS-V4; and (g), (h) POSS-V0.

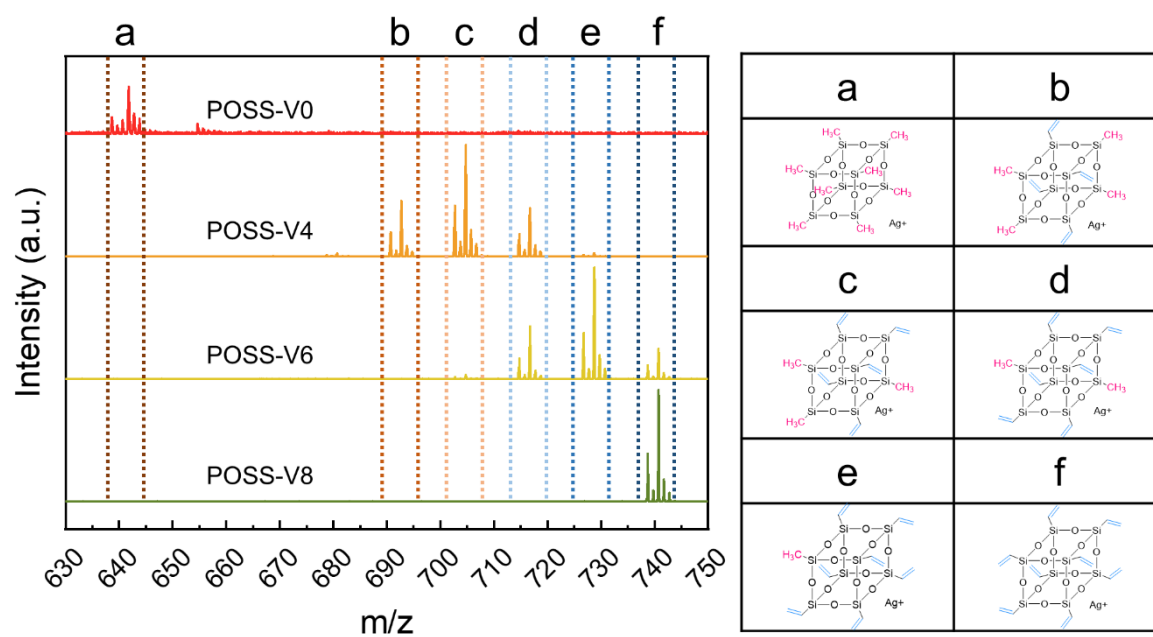

**Figure S4.** MALDI-ToF MS spectra of all prepared POSS-Vs.
